# Supplementary material
Source: Royal Society of Chemistry journal article supplement (doi:10.1039/d5lc00978b)
Supplement: d5lc00978b2.xlsx [file d5lc00978b2.xlsx]

## Sheet: Fig3B
Day 14	Day 21
0.381	0.30925
0.29225	0.4845
0.17825	0.75225
0.20725	0.877667
0.28825	1.01575
0.273	1.5415

## Sheet: Fig3D
Day 14	Day 21
0.641	0.0465
1.4905	0.12925
0.58075	0.006
0.66025	0.502
0.66625	0.438
0.4835	0.835

## Sheet: Fig4
Days at ALI	TEER of separate sample runs																				Treated
0	8	13	9	10	11	3	2		1	3	11.55	6.27	15.84
3	12	10	9	12	11	10	4	10	10	10	265.65	100.32	261.03
5	29	45	72	52	59	94	51	150	105	69	166.65	233.97	178.2
7	48	177	88	68	179						131.01	142.56	68.64
10	91	105	105	44	106	128	147	192	180	114	72.27	145.2	191.73
12	65	86	82	66	105	116	232	207	193	261	189.75	191.4	179.52
14	31	82	77	49	66	166	183	167	141	164	111.87	110.55	107.25
17	19	31	35	36	33	96	75	115	134	91	111.87	109.89	97.02
19	19	25	19	21	44	109	88	114	51	49	104.61	138.93	105.27
21	13	20	20	23	17	100	71	126	94	93	104.94	147.18	118.47

## Sheet: Fig5D
ALI Day	ALI+			1:1
1	12.87	26.07	18.81	44.22	32.34	26.07
7	38.61	69.96	193.71	250.8	332.64	672.87
14	138.27	154.77	145.53	607.53	690.69	474.21
21	97.35	117.15	140.25	150.15	297.33	231

## Sheet: Fig6A
Control	PM	PM + NAC
0.419	1.023	1.381
0.768	1.17	0.543
0.939	0.778	0.349
1.01	1.208	0.927

## Sheet: Fig6B
Control	PM	PM + NAC
-15.8	-91.8	-66.2
-63.2	-73.6	39
15.4	-12.2	31.6
43.8	-112.6	-55.4

## Sheet: Fig7
Control	PM	PM + NAC
1.59	3.14	3.26
1.61	3.77	3.06
1.48	3.63	2.95
1.48		2.67

## Sheet: Fig8
Control	PM	PM + NAC
0.547863	1.19373	1.06317
0.0493487	0.531357	1.55479
0.46446	0.620849	1.34075
0.495123	0.494068	1.37666

## Sheet: Fig9A
Control	PM	PM + NAC
0.374111	1.22454	0.910289
0.758263	1.30729	0.226802
0.310303	0.885914	0.138885
0.567167	0.936271	1.03272

## Sheet: Fig9B
Control	PM	PM + NAC
0.0304432	0.0228421	0.0188294
0.00500746	0.0366667	0.0304333
0.00977778	0.03124	0.0538353
0.0145592	0.0220698	0.0391662
